# Supplementary material
Source: PubMed Central journal article supplement (PMC4048925)
Supplement: NIHMS579036-supplement-Supplemental_File.pdf [file NIHMS579036-supplement-Supplemental_File.pdf]

## TABLE OF CONTENTS

- Materials and experimental methods
- **Figure S1.** ESI-LC-MS and ESI-LC-MS/MS chromatograms and spectra of an (AGT+DBE)-crosslinked GC-rich oligonucleotide fragment
- **Figure S2.** LC-MS chromatogram and spectrum of 12-mer peptide-ethylene-GC-rich 15-mer oligonucleotide crosslinks after piperidine workup
- **Figure S3.** LC-MS/MS chromatogram and spectrum of 12-mer peptide-ethylene-T<sub>5</sub>G<sub>2</sub>T<sub>4</sub> oligonucleotide crosslinks
- **Figure S4.** LC-MS and LC-MS/MS chromatograms and spectra of 12-mer peptide-ethylene-(AT)<sub>6</sub> oligonucleotide crosslinks
- **Figure S5.** LC-MS/MS and LC-MS<sup>3</sup> chromatograms and spectra showing the presence of N<sup>6</sup>-Et-dA adducts from calf thymus DNA
- **Figure S6.** LC-MS/MS and LC-MS<sup>3</sup> chromatograms and spectra showing the presence of Et-dG adducts from calf thymus DNA
- **Figure S7.** LC-MS/MS and LC-MS<sup>3</sup> chromatograms of synthesized authentic EtdG adducts
- **Figure S8.** UV-vis spectra of N1-EtdG and O<sup>6</sup>-EtdG adducts
- **Figure S9.** Yields of the various types of DPCs formed in the presence of AGT and <sup>14</sup>C-DBE, including control experiments
- **Figure S10.** HPLC chromatograms showing the presence of labile adducts (N7-EtG) in calf thymus DNA
- **Table S1.** Calculated and detected a-B and w ions resulting from fragmentation of the 12-mer peptide-ethylene-15-mer GC-rich oligonucleotide crosslinks
- **Table S2.** Calculated and detected a-B and w ions resulting from fragmentation of the 12-mer peptide-ethylene-(AT)<sub>6</sub> oligonucleotide crosslinks
- **Table S3.** Yields of conversion of ethylene-GSH adducts to Et adducts by Raney nickel reaction

## Materials and Experimental Methods

Warning: 1,2-Dibromoethane is toxic and a known carcinogen. It should be handled with extreme caution and protection should be worn at all times while handling it.

Materials. Unless otherwise mentioned, all materials were obtained from Sigma-Aldrich (St. Louis, MO) and were of the highest purity available. Oligonucleotides were purchased from Midland Certified Reagent Co. (Midland, TX). Human AGT was heterogeneously expressed in *Escherichia coli* and purified as described elsewhere.<sup>[1,2]</sup>

*Formation of DPC by AGT and DBE in oligonucleotides and calf thymus DNA.* In a typical reaction, 50 mg of sonicated calf thymus DNA in 50 mM potassium phosphate buffer (pH 7.7) containing 5 mM EDTA, 10 nmol of AGT, and 10 mM DBE (in case of <sup>14</sup>C-DBE, the specific activity was 6.5  $\mu$ Ci/ $\mu$ mol) was incubated for 3 h at 37 °C. (Note: turbidity may be seen in the DNA+DBE+AGT samples due to precipitation of alkylated AGT.

In case of oligonucleotides, 4 nmol of double-stranded 15-mer GC-rich (5-ACCCGCGTCCGCGCC) or 12-mer (AT)<sub>6</sub> oligonucleotide in 50 mM potassium phosphate buffer (pH 7.7) containing 5 mM EDTA, 2 nmol of AGT, and 20 mM DBE was incubated for 3 h at 37 °C.

*Detection of DPCs in GC- and AT-rich oligonucleotides.* After reaction of the oligonucleotides with AGT and DBE, the samples were loaded onto an Amicon filter ( $M_r$  3,000 cutoff) and centrifuged at 3,000  $\times$  g for 30 min. After the initial filtration, 200  $\mu$ L of NH<sub>4</sub>HCO<sub>3</sub> buffer (pH 8.0) was added and the samples were centrifuged again. This process was repeated twice to remove excess unreacted DBE. The residue remaining on the filter was then dissolved in 200  $\mu$ L of NH<sub>4</sub>HCO<sub>3</sub> buffer (pH 7.5) containing 0.01% SDS (w/v) and 2.5 mM dithiothreitol (DTT) and heated at 90 °C for 20 min. The solution was cooled and 2  $\mu$ g of trypsin was added and incubated for 16 h at 37 °C. After incubation the samples were dried and redissolved in 100  $\mu$ L of H<sub>2</sub>O and analyzed by LC-MS following a previously published protocol.<sup>[2]</sup> In the case of the piperidine workup, samples were dissolved in 200 mM piperidine and heated at 90 °C for 20 min. The samples were subsequently dried in a centrifugal lyophilizer and again dissolved in 50  $\mu$ L of H<sub>2</sub>O and dried. This process was repeated twice prior to LC-MS analysis.

LC-MS analysis of samples was performed in an ESI linear ion trap mass spectrometer (LTQ, Thermo-Fisher, San Jose, CA) connected to a Waters Acquity UPLC system (Waters, Milford, MA) and using an Acquity UPLC BEH octadecylsilane (C<sub>18</sub>) column (1.7  $\mu$ m, 1.0 mm  $\times$  100 mm). DNA-peptide crosslinks were separated using buffer A (containing 10 mM NH<sub>4</sub>CH<sub>3</sub>CO<sub>2</sub> in 2% CH<sub>3</sub>CN, v/v) and buffer B (containing 10 mM NH<sub>4</sub>CH<sub>3</sub>CO<sub>2</sub> in 95% CH<sub>3</sub>CN v/v) following a gradient program with a flow rate of 150  $\mu$ L min<sup>-1</sup>: 0-3.0 min, linear gradient from 100% A to 97% A; 3.0-4.5 min, linear gradient to 80% A; 4.5-5.0 min, linear gradient 100% B; 5.0-5.5 min, hold at 100% B; 5.5-6.5 min, linear gradient to 100% A; 6.5-9.5 min, hold at 100% A. The temperature of the column was maintained at 50 °C and samples (10  $\mu$ L)

were infused with an auto-sampler. ESI conditions were as follows: source voltage 4 kV, source current 100  $\mu$ A, auxiliary gas flow rate setting 20, sweep gas flow rate setting 5, sheath gas flow setting 34, capillary voltage -49 V, capillary temperature 350 °C, tube lens voltage -90 V. MS/MS conditions were as follows: normalized collision energy 35%, activation Q 0.250, activation time 30 ms. The quadruply-charged species ( $m/z$  1452.6 and 1244.5) were used for CID analysis. The  $m/z$  values of the CID fragments corresponding to the peptide-DNA crosslinks were calculated using a program linked to the Mass Spectrometry Group of the Department of Medicinal Chemistry at the University of Utah ([medlib.med.utah.edu/masspec](http://medlib.med.utah.edu/masspec)).

*Efficiency of Raney nickel-mediated desulfurization.* *S*-(2-Chloroethyl)GSH was prepared as described,<sup>[3]</sup> and 10 equiv was incubated with 2'-deoxyguanosine or 2'-deoxyadenosine in H<sub>2</sub>O/(CH<sub>3</sub>)<sub>2</sub>SO (1:1, v/v) for 2 h at 37 °C. Reactions were subsequently heated for 30 min at 90 °C under neutral conditions to release some of the modified bases (i.e., *N7*-alkyl dG). The products were separated by HPLC as previously described,<sup>[4]</sup> and *S*-[2-(*N7*-guanyl)ethyl]GSH, *S*-[2-(*N1*-deoxyadenosyl)ethyl]GSH, and *S*-[2-(*N6*-deoxyadenosyl)ethyl]GSH adducts were identified by UV spectroscopy<sup>[4-6]</sup> and LC-MS/MS.

The *N7*-EtG, *N1*-EtdA, and *N6*-EtdA adducts obtained after Raney nickel reaction by desulfurization of ethylene-GSH adducts (*vide infra*) were analyzed using [<sup>18</sup>O]-*N7*-G-(OH)<sub>3</sub>butane<sup>[3]</sup> as an internal standard (ISTD) by LC-MS/MS. LC-MS/MS analysis was performed using a Waters Acquity UPLC system (Waters) interfaced to a Thermo-Finnigan LTQ Orbitrap mass spectrometer (ThermoElectron) equipped with an ESI source. Chromatographic separation was achieved with a Waters Acquity UPLC BEH C18 octadecylsilane column (2.1 mm  $\times$  100 mm, 1.7  $\mu$ m). LC conditions were as follows: the mobile phase A was 0.1% CH<sub>3</sub>CO<sub>2</sub>H in H<sub>2</sub>O (v/v) and mobile phase B was 0.1% CH<sub>3</sub>CO<sub>2</sub>H in CH<sub>3</sub>CN (v/v). The following gradient program (v/v) was used with a flow rate of 300  $\mu$ L/min: the gradient started with 5% B (v/v), increased to 15% B (v/v) at 2 min, to 30% B (v/v) at 6 min, and held at 30% B (v/v) for 1 min. The column was re-equilibrated for 3 min with 5% B (v/v). The temperature of the column was maintained at 40 °C. The MS conditions were as follows: ion spray voltage, 4.5 kV; capillary voltage, 20 V; capillary temperature, 350 °C; tube lens voltage, 40 V.

*Detection and quantitation of DPCs formed with calf thymus DNA.* Following DPC formation (*vide supra*), the reaction mixtures were subjected to C<sub>2</sub>H<sub>5</sub>OH precipitation using 70% cold C<sub>2</sub>H<sub>5</sub>OH (v/v) and 0.3 M sodium acetate. The precipitate was pelleted by centrifugation at 10,000  $\times$  *g*, washed three times with cold 80% C<sub>2</sub>H<sub>5</sub>OH to remove unreacted excess DBE, and redissolved in 50 mM Tris buffer (pH 7.4) containing 1 mM CaCl<sub>2</sub>. In case of the radioactive samples, 2  $\mu$ L (from a total volume of 200  $\mu$ L) of the reaction mixture was used for scintillation counting after adding 4 mL of scintillation cocktail. The reaction mixtures were digested with proteinase K for 3 h (to avoid depurination of the labile adducts) and C<sub>2</sub>H<sub>5</sub>OH-precipitated to remove the digested peptides. The precipitate were dissolved in 50 mM potassium phosphate buffer (pH 7.4), heated at 90 °C for 30 min to cause depurination, and again C<sub>2</sub>H<sub>5</sub>OH-precipitated. The supernatant (following centrifugation) was separated and 10  $\mu$ L (of a total volume 1.0 mL) was counted (in a liquid scintillation counter) to quantify labile adducts.

The precipitate was dissolved in 50 mM potassium phosphate buffer (200  $\mu$ L total volume) and 2  $\mu$ L was subjected to scintillation counting (for non-labile adducts). The supernatant (containing the labile crosslinks) was dried under a stream of N<sub>2</sub> and redissolved in 50 mM potassium phosphate buffer (pH 7.4, 200  $\mu$ L total volume). Both the solutions (labile and non-labile) were separately treated with Raney Ni (5  $\mu$ L) at 60 °C for 30 min. The reactions were cooled, centrifuged to remove the Ni, and purified using a C<sub>18</sub> SPE column (Agilent, 3 mL). In the case of labile modifications, the reaction mixtures were analyzed by HPLC-flow counting. For the non-labile DPCs, the SPE-purified products were digested with nucleases and phosphatases following standard literature procedures.<sup>[7]</sup>

After digestion, the reaction mixture was passed through an Amicon filter ( $M_r$  3,000 cutoff) and analyzed by LC-MS/MS and LC-MS<sup>3</sup>. In case of <sup>14</sup>C-DBE, the nucleoside-ethyl adducts were HPLC-purified after spiking with authentic standards and monitoring UV absorbance (260 nm). Radioactivity in the fractions corresponding to the various ethyl dG and dA adducts was counted using a scintillation counter for quantitation.

For LC-MS analysis, an ESI linear trap ion mass spectrometer (LTQ, Thermo-Fisher, San Jose, CA) was used, connected to a Waters Acquity UPLC system (Waters, Milford, MA) with an Acquity UPLC BEH octadecylsilane (C<sub>18</sub>) column (1.7  $\mu$ m, 2.1 mm  $\times$  100 mm). DNA-peptide crosslinks were separated using solvent A (containing 0.1% HCO<sub>2</sub>H and 5% CH<sub>3</sub>CN, v/v) and solvent B (containing 0.1% HCO<sub>2</sub>H and 95% CH<sub>3</sub>CN, v/v) following a gradient program with a flow rate of 300  $\mu$ L min<sup>-1</sup>: 0-5.0 min, linear gradient from 100% A to 75% A (v/v); 5.0-5.5 min, linear gradient to 100% B; 5.5-6.5 min, hold at 100% B (v/v); 6.5-7.0 min, linear gradient to 100% A (v/v); 7-10 min, hold at % A (v/v). The temperature of the column was maintained at 40°C and samples (20  $\mu$ L) were infused with an auto-sampler. The mass spectrometer was tuned using authentic N<sup>2</sup>-EtdG.

**Figure S1.** ESI-LC-MS and ESI-LC-MS/MS chromatograms and spectra of an (AGT+DBE)-crosslinked GC-rich oligonucleotide fragment. AGT (10  $\mu$ M) + DBE (20 mM)-modified DNA fragment (20  $\mu$ M) was digested with trypsin (2  $\mu$ g) at 37  $^{\circ}$ C for 16 h, heated at 90  $^{\circ}$ C for 30 min, and analyzed by LC-MS. After removal of unbound DBE, it was heated at 90  $^{\circ}$ C for 15 min, digested with trypsin, and subjected to LC-MS analysis in the negative ESI mode. The LC chromatogram (Figure S1b) showed a collection of peaks at retention time ( $t_R$ )  $\sim$ 6 min with  $m/z$  values of 1452.6 and 1937.5 that corresponds to the -4 and -3 charged species of the 12-mer tryptic peptide (GNPVPILIPCHR) of AGT covalently linked to the 15-mer GC-rich oligonucleotide (5'-ACCCGCGTCCGCGCC) through an ethylene linkage (Figure S1c). The collection of peaks at  $t_R$   $\sim$ 6 min observed in the chromatogram is probably due to crosslinks of AGT at various positions within the oligonucleotide, generating multiple isomers of the DPCs. Collision-induced dissociation (CID) of the  $m/z$  1452.6 species gave a-B and w ions that are consistent with the presence of the above 12-mer peptide-ethylene-(15-mer, GC-rich) oligonucleotide complex (Figure S1d and S1e). To further confirm that it is indeed a non-labile DPC, the trypsin-digested reaction mixture was subjected to hot piperidine treatment to remove any residual labile crosslinks. Subsequent LC-MS analysis gave a similar -4 charged  $m/z$  1452.6 peak. a) Calculated  $m/z$  values of the expected a-B and w ions of the 12-mer peptide-ethylene-(GC-rich) oligonucleotide crosslink. b) LC-MS chromatogram of (AGT+DBE)-treated GC-rich oligonucleotide reaction mixture. c) LC-MS spectra of a region of the chromatogram at  $t_R$   $\sim$ 6 min in Part a showing the presence of the  $m/z$  1452.6 ion. d) LC-MS/MS chromatogram of the  $m/z$  1452.6 ion. e) CID spectra of  $m/z$  1452.6(-4) species from the 12-mer peptide-ethylene-GC rich oligonucleotide.

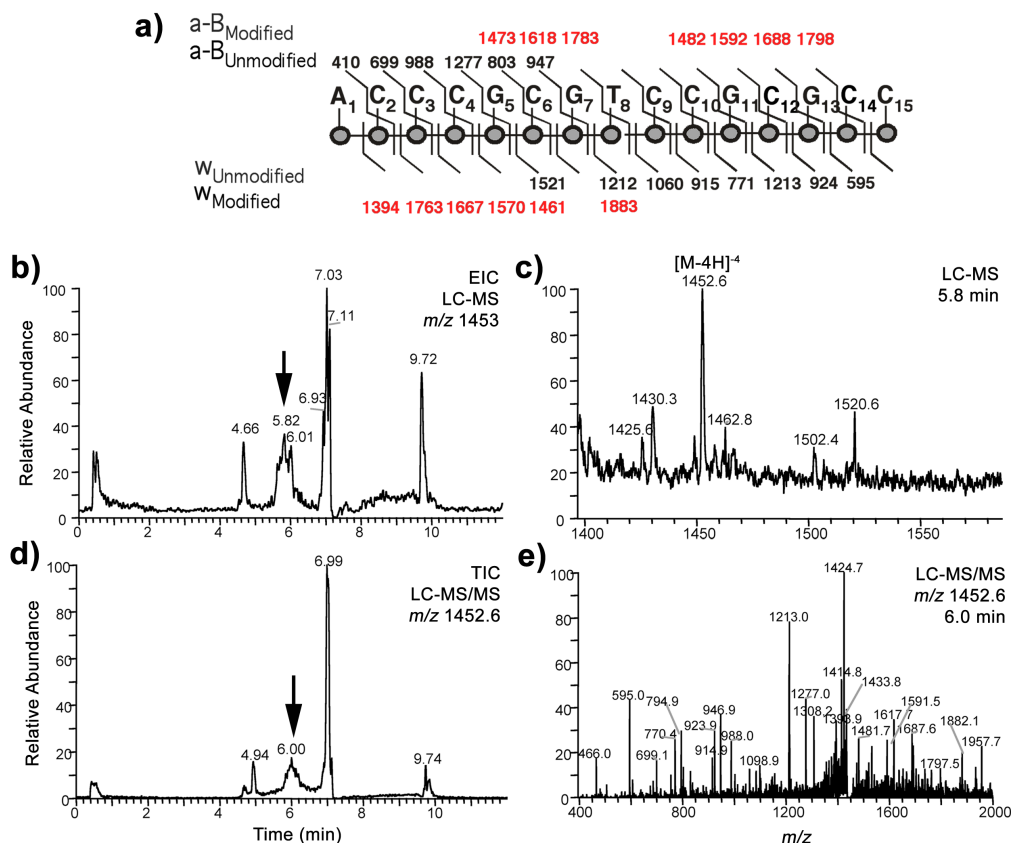

**Figure S2.** LC-MS chromatogram and spectrum of 12-mer peptide-ethylene-[GC-rich 15-mer oligonucleotide] crosslinks after piperidine treatment to remove labile adducts. The AGT (10  $\mu$ M)+DBE (20 mM)-modified DNA fragment (20  $\mu$ M) was digested with trypsin (2  $\mu$ g) at 37  $^{\circ}$ C for 16 h, treated with hot piperidine for 30 min, and analyzed by LC-MS. a) LC-MS chromatogram of AGT+DBE treated GC-rich 15-mer oligonucleotide reaction mixture. The arrow indicates peaks corresponding to the crosslinks. b) LC-MS spectra of a region of the chromatogram at  $t_R \sim 5.4$  min showing presence of the  $m/z$  1452.6 ion, which corresponds to the -4 charged crosslink species.

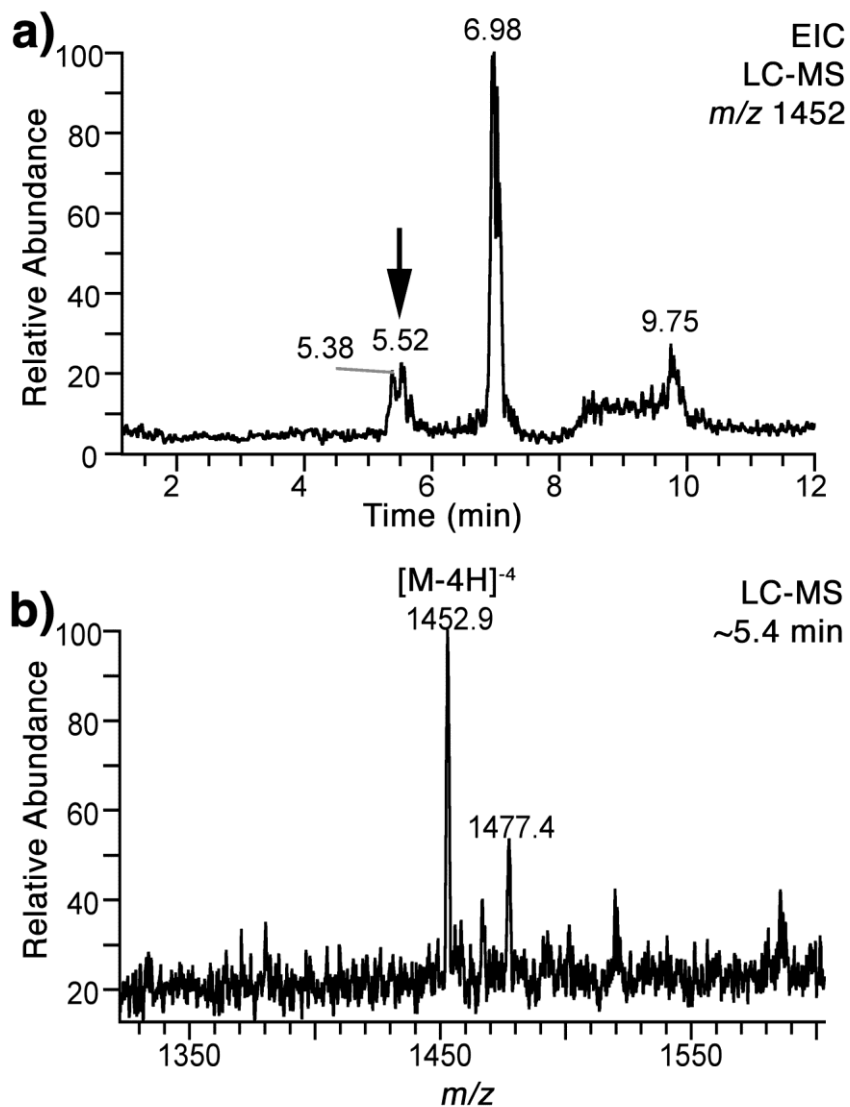

**Figure S3.** LC-MS/MS chromatogram and spectrum of 12-mer peptide-ethylene- $T_5G_2T_4$  oligonucleotide crosslink. The AGT (10  $\mu$ M)+DBE (20 mM)-modified DNA fragment (20  $\mu$ M) was digested with trypsin (2  $\mu$ g) at 37  $^{\circ}$ C for 16 h, heated at 90  $^{\circ}$ C for 30 min, and analyzed by LC-MS/MS. a) Calculated  $m/z$  values of the expected a-B and w ions of the 12-mer peptide-ethylene- $T_5G_2T_4$  oligonucleotide crosslink. b) LC-MS/MS chromatogram of the 12-mer peptide-ethylene- $T_5G_2T_4$  oligonucleotide crosslinks. c) CID spectrum of a region of the chromatogram at  $t_R \sim 4.9$  min showing presence of the various a-B and w ions, which corresponds to the 12-mer peptide-ethylene- $T_5G_2T_4$  oligonucleotide crosslinks.

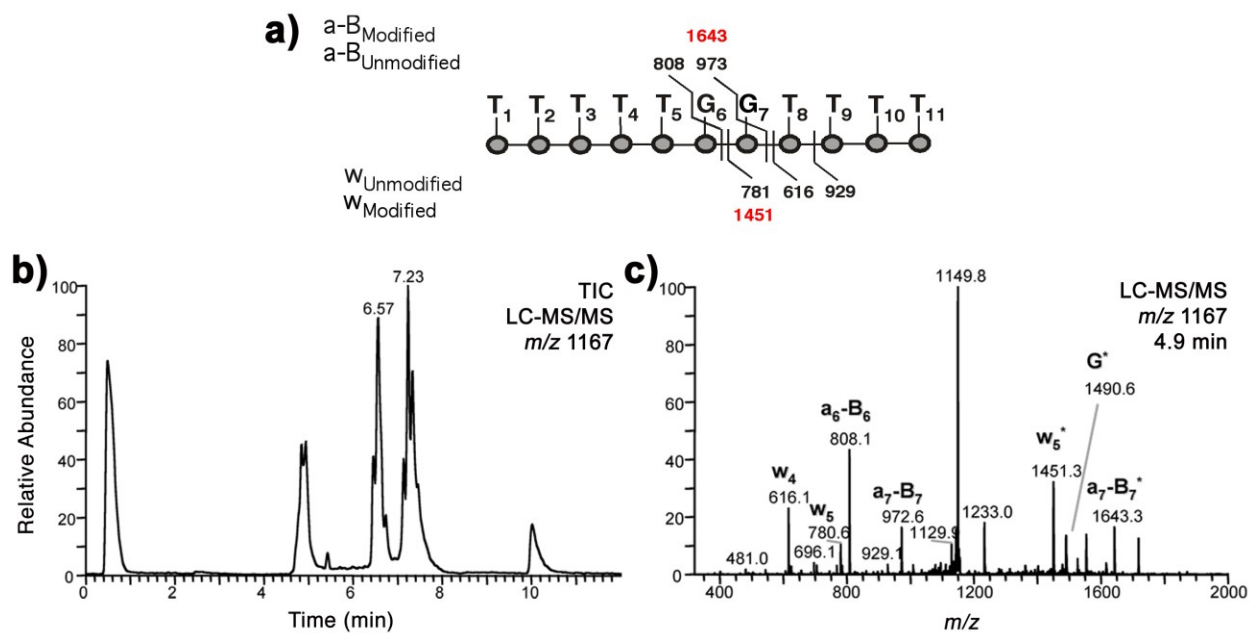

**Figure S4.** LC-MS and LC-MS/MS chromatograms and spectra of 12-mer peptide-ethylene-(AT)<sub>6</sub> oligonucleotide crosslinks. AGT (10 μM)+DBE (20 mM)-modified DNA fragment (20 μM) was digested with trypsin (2 μg) at 37 °C for 16 h, heated at 90 °C for 30 min, and analyzed by LC-MS/MS. The LC-MS data showed a collection of peaks at *t*<sub>R</sub> ~6 min with *m/z* values of 1244.5 and 1659.9 that corresponds to the -4 and -3 charged species of the 12-mer peptide (GNPVPILIPCHR) of AGT covalently linked to the (AT)<sub>6</sub> oligonucleotide through an ethylene linker. CID of the *m/z* 1244.5 species gave a-B and w ions that are consistent with the presence of the 12-mer peptide-ethylene-(AT)<sub>6</sub> complex. a) Calculated *m/z* values of the expected a-B and w ions of the 12-mer peptide-ethylene-(AT)<sub>6</sub> oligonucleotide crosslink. b) LC-MS chromatogram of AGT+DBE treated (AT)<sub>6</sub> oligonucleotide reaction mixture. c) LC-MS spectra of a region of the chromatogram at *t*<sub>R</sub> ~6 min in a showing presence of the *m/z* 1244.5(-4) ion. d) LC-MS/MS chromatogram of the *m/z* 1244.5 ion. e) CID spectra of *m/z* 1244.5(-4) species from 12-mer peptide-ethylene-(AT)<sub>6</sub> oligonucleotide.

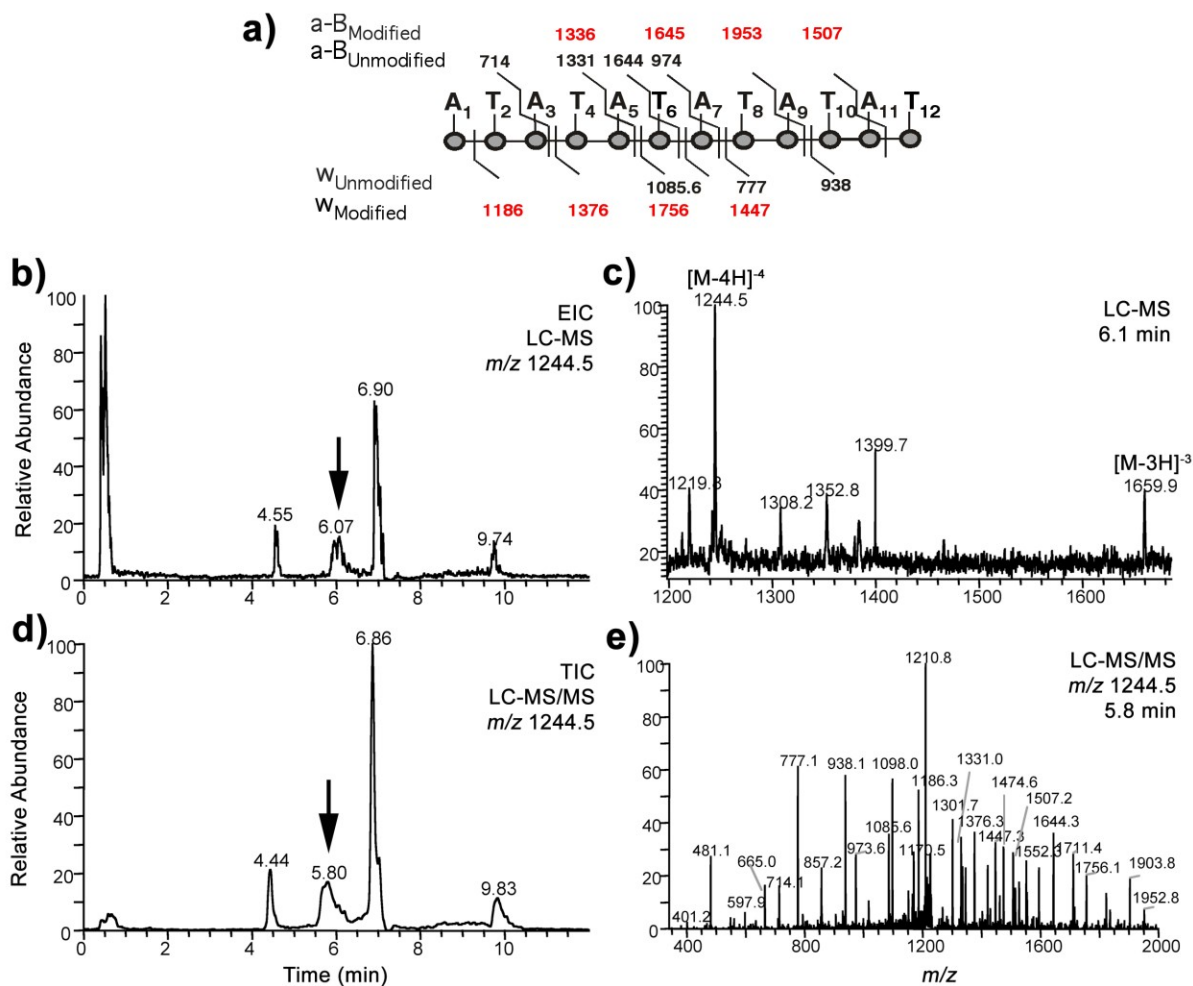



**Figure S5.** LC-MS/MS and LC-MS<sup>3</sup> chromatograms and spectra showing the presence of N<sup>6</sup>-EtdA adducts from calf thymus DNA. Calf thymus DNA was treated with AGT (20 μM) and DBE (10 mM) to form the DPCs. The DPCs formed were converted to EtdA adducts by Raney Ni treatment and analyzed by LC-MS/MS and LC-MS<sup>3</sup> using specific transitions. a) LC-MS/MS chromatogram using the *m/z* 280→164 transition. b) LC-MS<sup>3</sup> chromatogram using the *m/z* 280→164→136 transition. c) LC-MS/MS spectra of the region of the chromatogram at *t<sub>R</sub>* ~3.6 min in a showing presence of the *m/z* 164 ion, which indicates presence of the ethyl dA adduct. d) LC-MS<sup>3</sup> spectra of the region of the chromatogram at *t<sub>R</sub>* ~3.6 min in b showing the presence of the *m/z* 136 ion, again indicating the presence of the EtdA adduct.

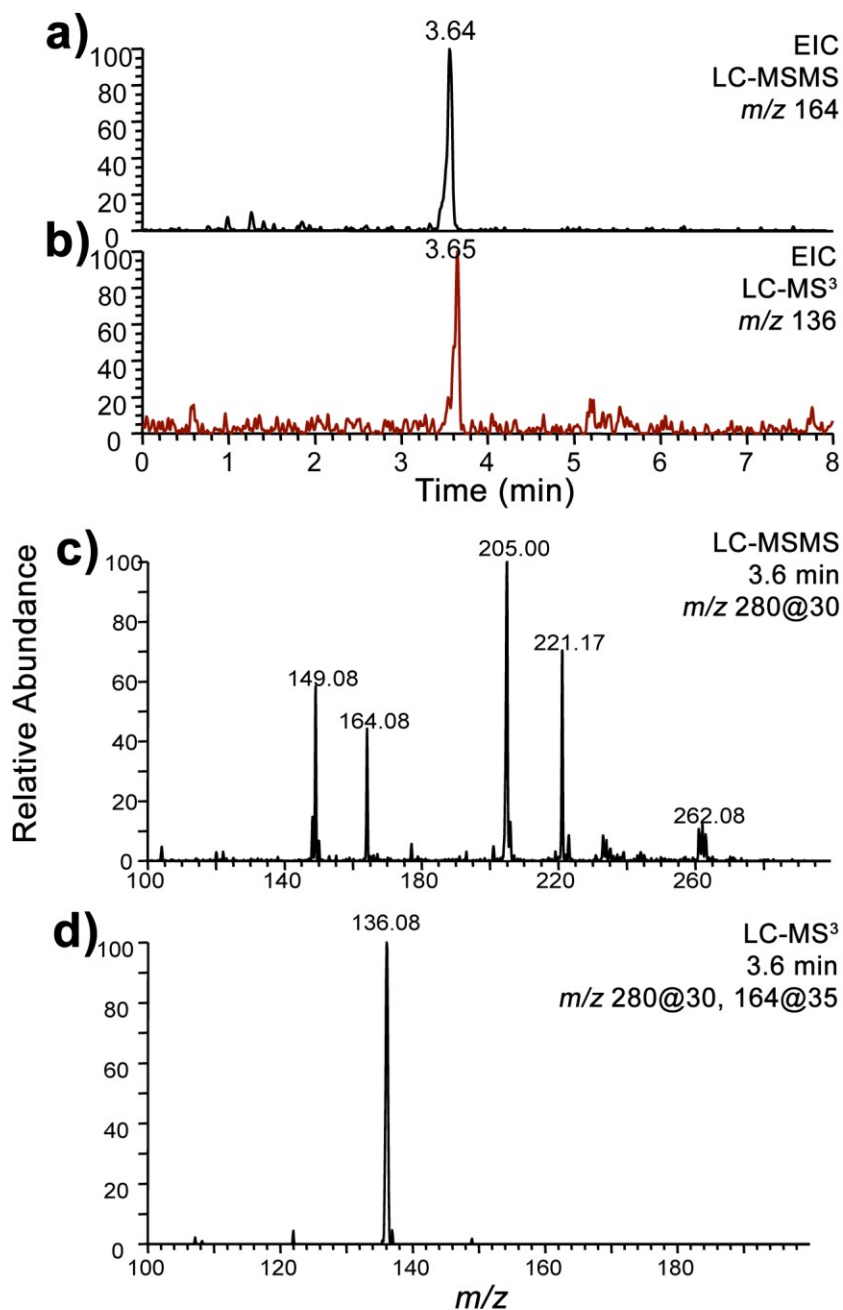

**Figure S6.** LC-MS/MS and LC-MS<sup>3</sup> chromatograms and spectra showing the presence of EtdG adducts in calf thymus DNA. Calf thymus DNA was treated with AGT (20  $\mu$ M) and DBE (10 mM) to form the DPCs. The DPCs formed were converted to EtdG adducts by Raney Ni treatment and analyzed by LC-MS/MS and LC-MS<sup>3</sup> using specific transitions. a) LC-MS/MS chromatogram using the  $m/z$  296 $\rightarrow$ 180 transition. b) LC-MS<sup>3</sup> chromatogram using the  $m/z$  296 $\rightarrow$ 180 $\rightarrow$ 163 transition (for  $N^2$ -EtdG adducts). c) LC-MS<sup>3</sup> chromatogram using the  $m/z$  296 $\rightarrow$ 180 $\rightarrow$ 152 transition (for  $N^1$ -EtdG and  $O^6$ -EtdG adducts). d) LC-MS<sup>3</sup> spectra of the region of the chromatogram at  $t_R \sim 3.6$  min in b) showing the presence of the  $m/z$  163 ion, which indicates the presence of the  $N^2$ -EtdG adduct. e) LC-MS<sup>3</sup> spectra of the region of the chromatogram at  $t_R \sim 4.1$  min in c) showing presence of the  $m/z$  152 ion, which indicates the presence of the  $O^6$ -EtdG adduct.

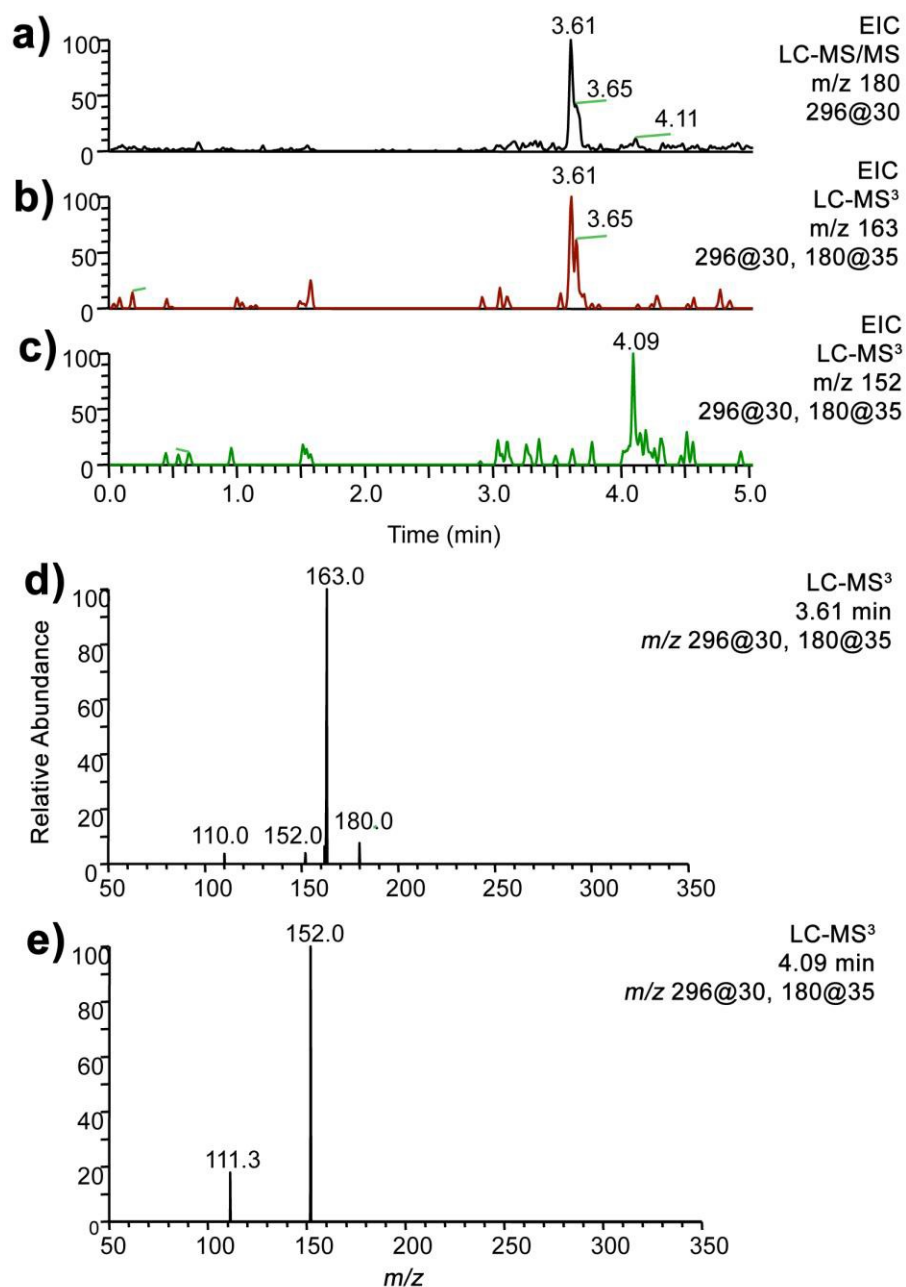

**Figure S7.** LC-MS/MS and LC-MS<sup>3</sup> chromatograms of synthesized authentic EtdG adducts. a) Extracted ion chromatogram (EIC) using the  $m/z$  296 $\rightarrow$ 180 transition. b) LC-MS<sup>3</sup> chromatogram using CID of  $m/z$  296@30,180@30. Fragmentation of the daughter ion  $m/z$  180 gave two major fragments at  $m/z$  163 ( $N^2$ -EtdG) and  $m/z$  152 ( $N1$ -EtdG and  $O^6$ -EtdG adducts). Based on the UV-vis spectra, the peak at  $t_R \sim 3.2$  min (with a major ion at  $m/z$  152) was assigned to the  $N1$ -EtdG and the peak at  $t_R \sim 4.0$  min (with a major ion at  $m/z$  152) was assigned to the  $O^6$ -EtdG adduct.

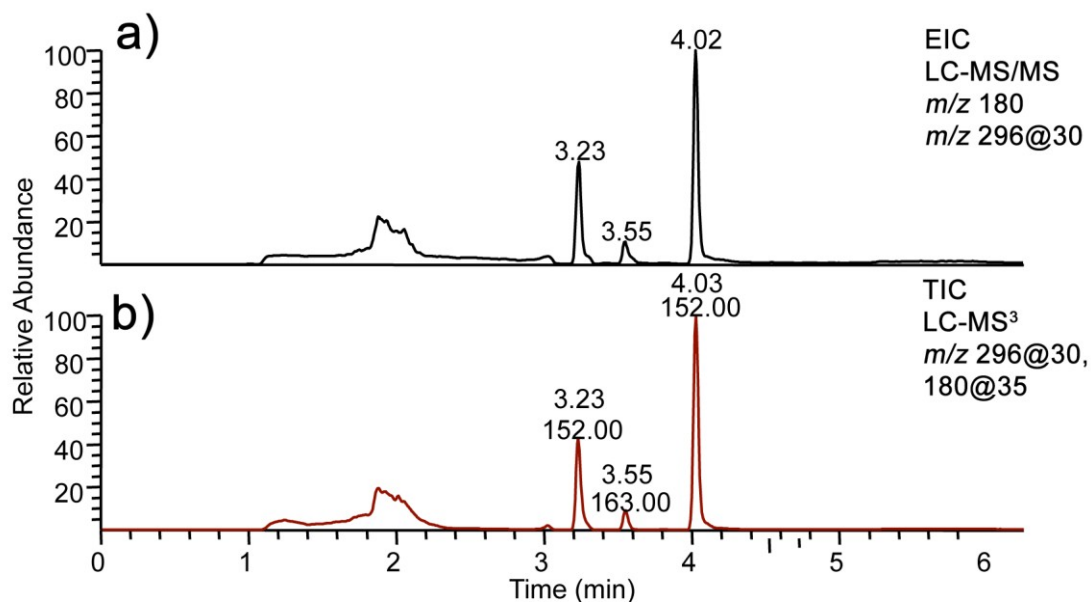

**Figure S8.** UV-vis spectra of *N*1- and *O*<sup>6</sup>-EtdG adducts

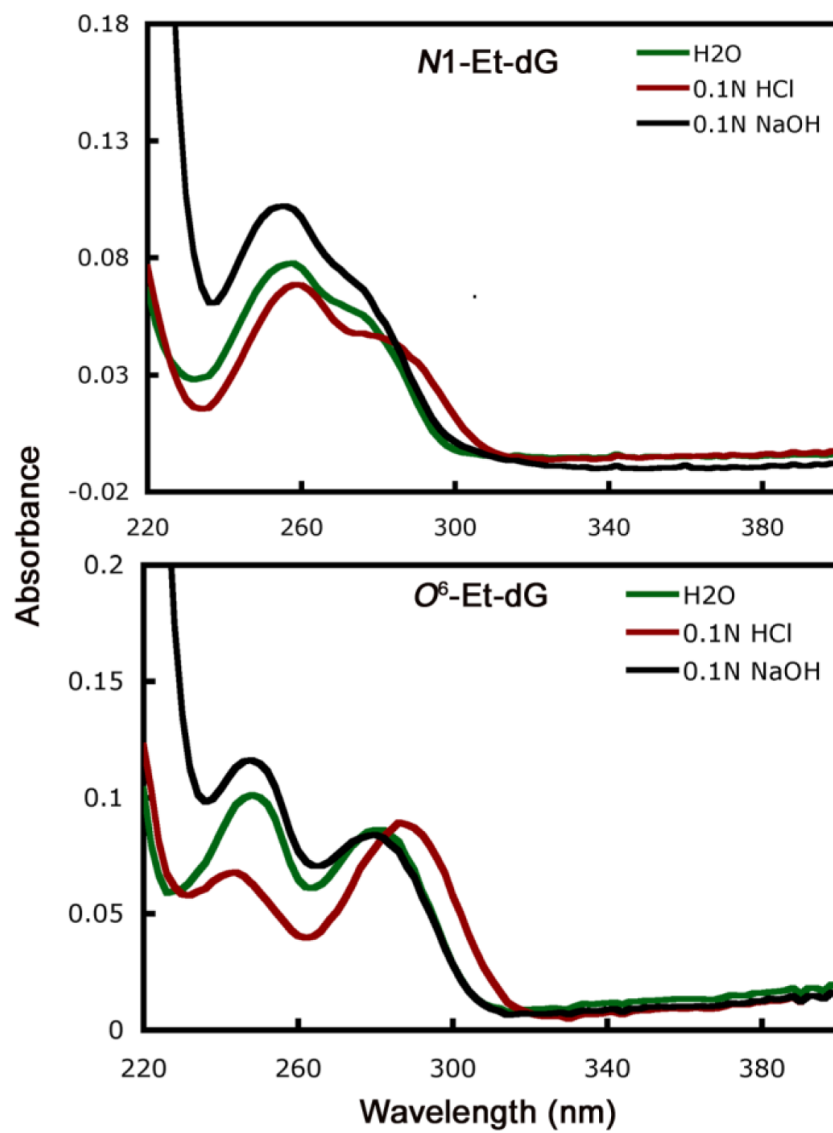

**Figure S9.** Yields of the various types of DPCs formed in the presence of AGT and  $^{14}\text{C}$ -DBE, including control experiments. Yields are shown for various non-labile DPCs ( $N^1$ -dG,  $N^2$ -dG, and  $O^6$ -dG) measured as their corresponding Et adducts ( $n = 3, \pm \text{SD}$ ).

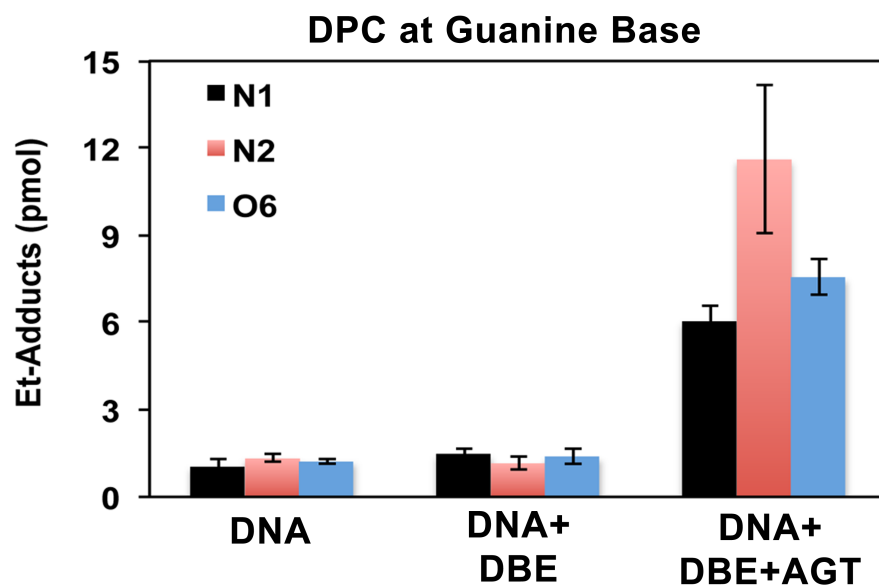

**Figure S10.** HPLC chromatograms showing the presence of labile adducts (*N*7-EtG) in calf thymus DNA. Calf thymus DNA was treated with AGT (20  $\mu$ M) and  $^{14}$ C-DBE (2 mM) to form DPCs. The DPCs were purified and converted to *N*7-EtG (or possibly *N*3-EtA) adducts by neutral thermal hydrolysis. The ethyl adducts were analyzed by HPLC-flow counting (flow counter coupled in-line to an HPLC). a) Control (DNA+ $^{14}$ C-DBE). b) Sample (DNA+ $^{14}$ C-DBE+AGT).

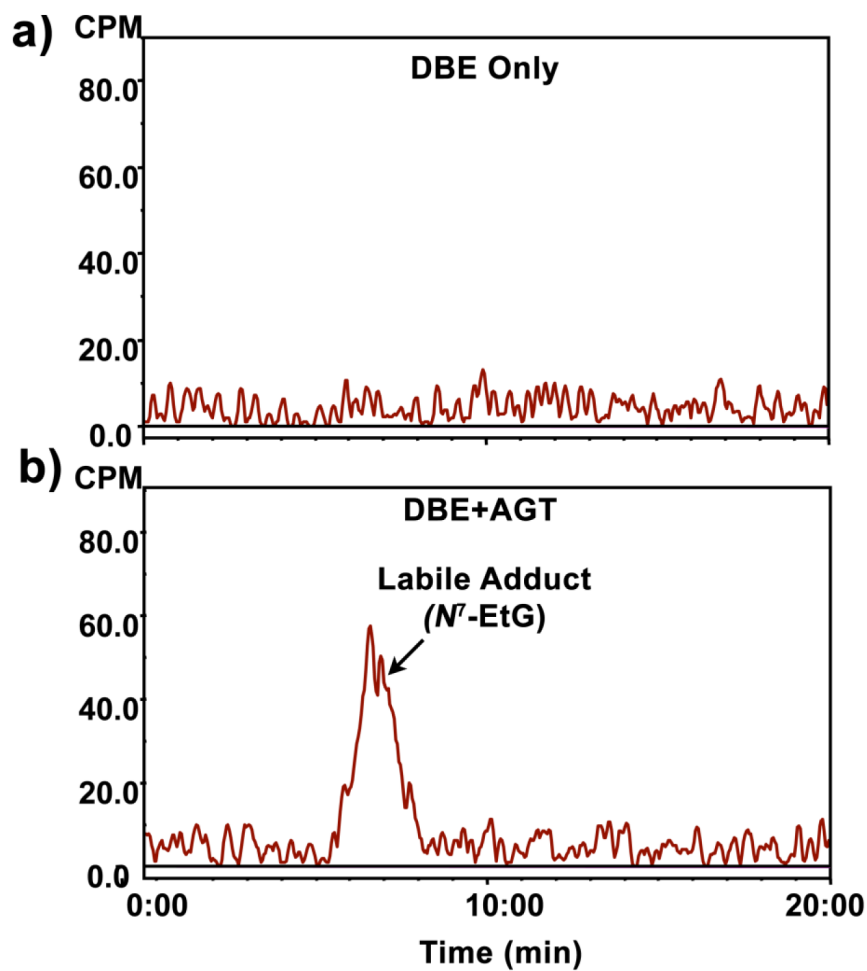

**Table S1.** Calculated CID fragments expected from the 12-mer peptide (GNPVPILIPCHR)-ethylene-GC rich oligonucleotide crosslinks. Fragments detected in the experimental data (Figure S1) are shown in red.

Sequence :ACC CGC GTC CGC GCC 5OH - DNA[15mer] - 3'OH

C:9 T:1 A:1 G:4

Linker: CH<sub>2</sub>CH<sub>2</sub>, 28

Peptide: GNPVPILIPCHR, 1413.7

monoisotopic mass, negative mode

| n  | charge | Unmodified |          | Modified |          |
|----|--------|------------|----------|----------|----------|
|    |        | a-B        | w        | a-B      | w        |
| 1  | -1     |            | 306.048  |          | 1648.012 |
| 2  | -1     | 410.085    | 595.094  | 1752.038 | 1937.058 |
|    | -2     |            |          |          | 968.025  |
| 3  | -1     | 699.131    | 924.146  | 2041.084 | 2266.110 |
|    | -2     | 349.061    | 461.569  | 1020.038 | 1132.551 |
| 4  | -1     | 988.177    | 1213.192 | 2330.130 | 2555.156 |
|    | -2     | 493.584    | 606.092  | 1164.561 | 1277.074 |
| 5  | -1     | 1277.223   | 1542.244 | 2619.176 | 2884.209 |
|    | -2     | 638.107    | 770.618  | 1309.084 | 1441.600 |
| 6  | -1     | 1606.275   | 1831.290 | 2948.229 | 3173.255 |
|    | -2     | 802.634    | 915.141  | 1473.610 | 1586.123 |
|    | -3     |            |          | 982.071  | 1057.079 |
| 7  | -2     | 947.157    | 1059.664 | 1618.133 | 1730.646 |
|    | -3     | 631.102    | 706.106  | 1078.419 | 1153.428 |
| 8  | -2     | 1111.683   | 1211.687 | 1782.659 | 1882.669 |
|    | -3     | 740.786    | 807.455  | 1188.103 | 1254.777 |
| 9  | -2     | 1263.705   | 1376.213 | 1934.682 | 2047.195 |
|    | -3     | 842.134    | 917.139  | 1289.452 | 1364.461 |
| 10 | -2     | 1408.228   | 1520.736 | 2079.205 | 2191.718 |
|    | -3     | 938.483    | 1013.488 | 1385.098 | 1460.809 |
|    | -4     | 703.610    | 759.864  | 1039.098 | 1095.355 |

|    |    |          |          |          |          |
|----|----|----------|----------|----------|----------|
| 11 | -2 | 1552.751 | 1685.262 | 2223.728 | 2356.244 |
|    | -3 | 1034.832 | 1123.172 | 1482.149 | 1570.493 |
|    | -4 | 775.872  | 842.127  | 1111.360 | 1177.618 |
| 12 | -2 | 1717.278 | 1829.785 | 2388.254 | 2500.767 |
|    | -3 | 1144.516 | 1219.521 | 1591.833 | 1666.842 |
|    | -4 | 858.135  | 914.388  | 1193.623 | 1249.879 |
| 13 | -2 | 1861.801 | 1974.308 | 2532.777 | 2645.290 |
|    | -3 | 1240.864 | 1315.869 | 1688.182 | 1763.191 |
|    | -4 | 930.396  | 986.650  | 1265.884 | 1322.141 |
| 14 | -3 | 1350.548 | 1412.218 | 1797.866 | 1859.539 |
|    | -4 | 1012.659 | 1058.911 | 1384.148 | 1394.402 |
|    | -5 | 809.926  | 846.927  | 1078.316 | 1115.320 |

---



**Table S2.** Calculated CID fragments expected from the 12-mer peptide (GNPVPILIPCHR)-ethylene-(AT)<sub>6</sub> crosslinks. Fragments detected in the experimental data (Figure S4) are shown in red.

Sequence : ATA TAT ATA TAT 5'OH - DNA[12mer] – 3'OH

T:6 A:5 N:1

Linker: CH<sub>2</sub>CH<sub>2</sub>, 28

Peptide: GNPVPILIPCHR, 1413.7

monoisotopic mass, negative mode

| n  | charge | Unmodified      |                 | Modified        |                 |
|----|--------|-----------------|-----------------|-----------------|-----------------|
|    |        | a-B             | w               | a-B             | w               |
| 1  | -1     |                 | 321.047         |                 | 1662.012        |
| 2  | -1     | 410.085         | 634.105         | 1752.038        | 1975.070        |
| 3  | -1     | <b>714.131</b>  | <b>938.150</b>  | 2056.084        | 2279.115        |
|    | -2     | 356.561         | 468.571         | 1027.538        | 1139.053        |
| 4  | -1     | 1027.188        | 1251.208        | 2369.141        | 2592.173        |
|    | -2     | 513.090         | 625.100         | 1184.067        | 1295.582        |
| 5  | -1     | <b>1331.234</b> | 1555.253        | 2673.187        | 2896.218        |
|    | -2     | <b>665.113</b>  | <b>777.123</b>  | <b>1336.089</b> | <b>1447.605</b> |
| 6  | -1     | 1644.291        | 1868.311        | 2986.244        | 3209.276        |
|    | -2     | 821.641         | 933.651         | 1492.618        | 1604.134        |
| 7  | -2     | <b>973.664</b>  | <b>1085.674</b> | <b>1644.641</b> | 1756.156        |
|    | -3     | 648.773         | 723.447         | 1096.091        | <b>1170.435</b> |
| 8  | -2     | 1130.193        | 1242.203        | 1801.170        | 1912.685        |
|    | -3     | 753.126         | 827.799         | 1200.444        | 1274.787        |
| 9  | -2     | 1282.216        | 1394.226        | <b>1953.192</b> | 2064.708        |
|    | -3     | 854.474         | 929.148         | <b>1301.792</b> | <b>1376.136</b> |
| 10 | -2     | 1438.744        | 1550.754        | 2109.721        | 2221.237        |
|    | -3     | 958.827         | 1033.500        | 1406.145        | 1480.488        |
| 11 | -2     | 1590.767        | 1702.777        | 2261.744        | 2373.259        |
|    | -3     | 1060.175        | 1134.849        | <b>1507.493</b> | 1581.873        |
|    | -4     | 794.879         | 850.884         | 1130.368        | <b>1186.126</b> |

**Table S3.** Yields of conversion of ethylene-GSH adducts to ethyl adducts by Raney nickel reaction.

| Et adduct                    | Yield (%) <sup>a</sup> |
|------------------------------|------------------------|
| <i>N</i> <sup>7</sup> -Et G  | 90.3 ± 3.1             |
| <i>N</i> <sup>1</sup> -Et dG | 88.7 ± 4.0             |
| <i>N</i> <sup>6</sup> -Et dA | 91.0 ± 6.1             |

<sup>a</sup> Mean ± SD obtained from triplicate assays

### References (for Supporting Information section)

1. S. Edara, S. Kangula, K. Goodtzova, and A. E. Pegg, *Cancer Res.* **1996**, *56*, 5571-5575.
2. Q. Fang, A. M. Noronha, S. P. Murphy, C. J. Wilds, J. I. Tubbs, J. A. Tainer, G. Chowdhury, F. P. Guengerich, A. E. Pegg, *Biochemistry* **2008**, *47*, 10892-10903.
3. W. G. Humphreys, D.-H. Kim, J. L. Cmarik, T. Shimada, F. P. Guengerich, *Biochemistry* **1990**, *29*, 10342-10350.
4. S.-H. Cho, F. P. Guengerich, *Chem. Res. Toxicol.* **2012**, *25*, 706-712.
5. D.-H. Kim, W. G. Humphreys, F. P. Guengerich, *Chem. Res. Toxicol.* **1990**, *3*, 587-594.
6. N. Ozawa, F. P. Guengerich, F. P., *Proc. Natl. Acad. Sci. U. S. A.* **1983**, *80*, 5266-5270.
7. B. Chen, X. Zhou, K. Taghizadeh K, J. Chen, J. Stubbe, P. C. Dedon, *Chem. Res. Toxicol.* **2007**, *20*, 1701-1708.
